# Supplementary material
Source: PubMed Central journal article supplement (PMC7689746)
Supplement: CPT-108-1233-s001.pdf [file CPT-108-1233-s001.pdf]

**Figure S1.** Histograms of AED-MS Alda total score, A score, and B score. Y-axes represent the frequency of subjects.

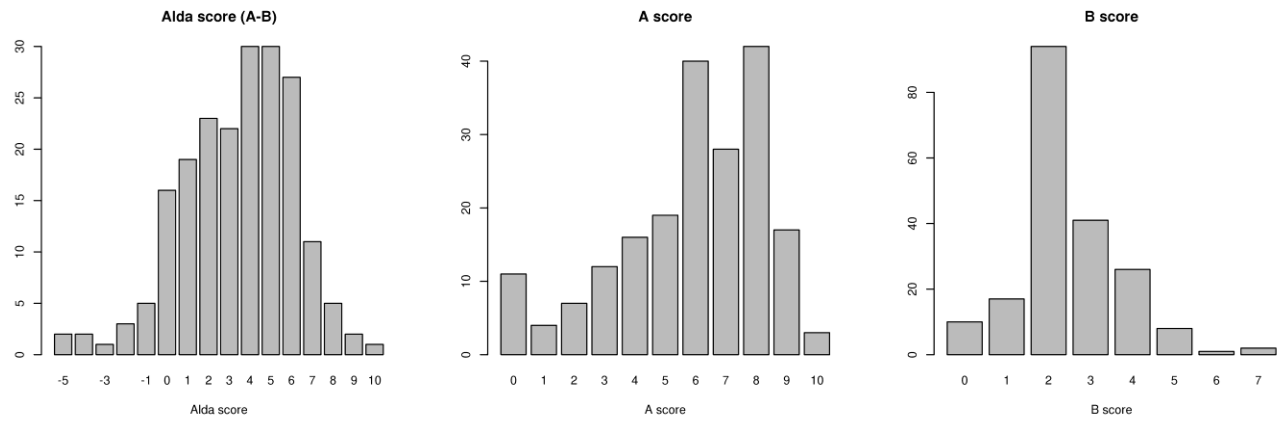

**Figure S2.** Q-Q plots for (a) SNP-level and (b) gene-level analysis.

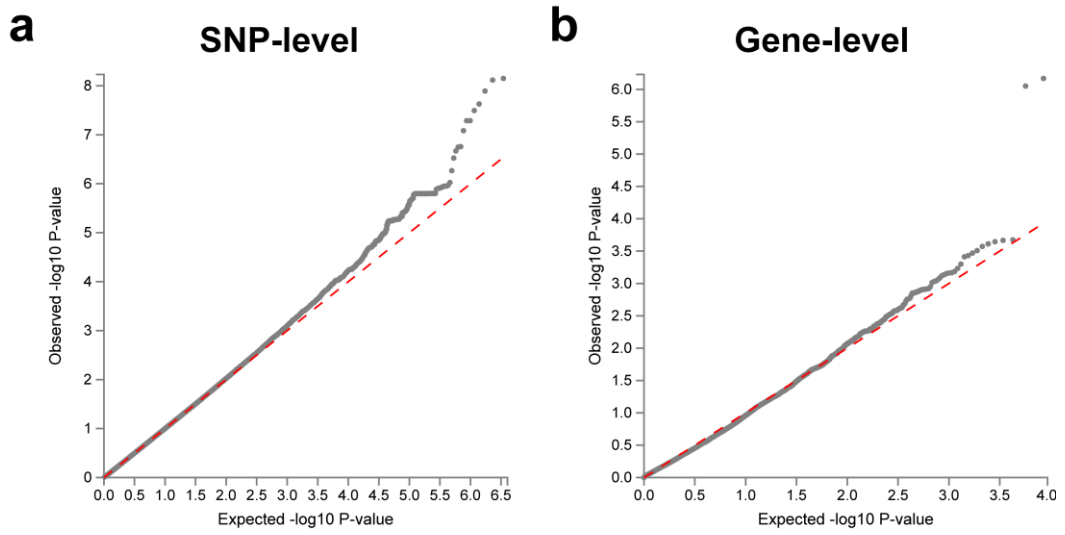

**Figure S3.** (a) Gene expressions of *THSD7A* across multiple human tissues and (b) notable eQTL analysis results of rs78835388 on *THSD7A* gene expression in human tissues. Graphics were obtained from GTEx Portal.

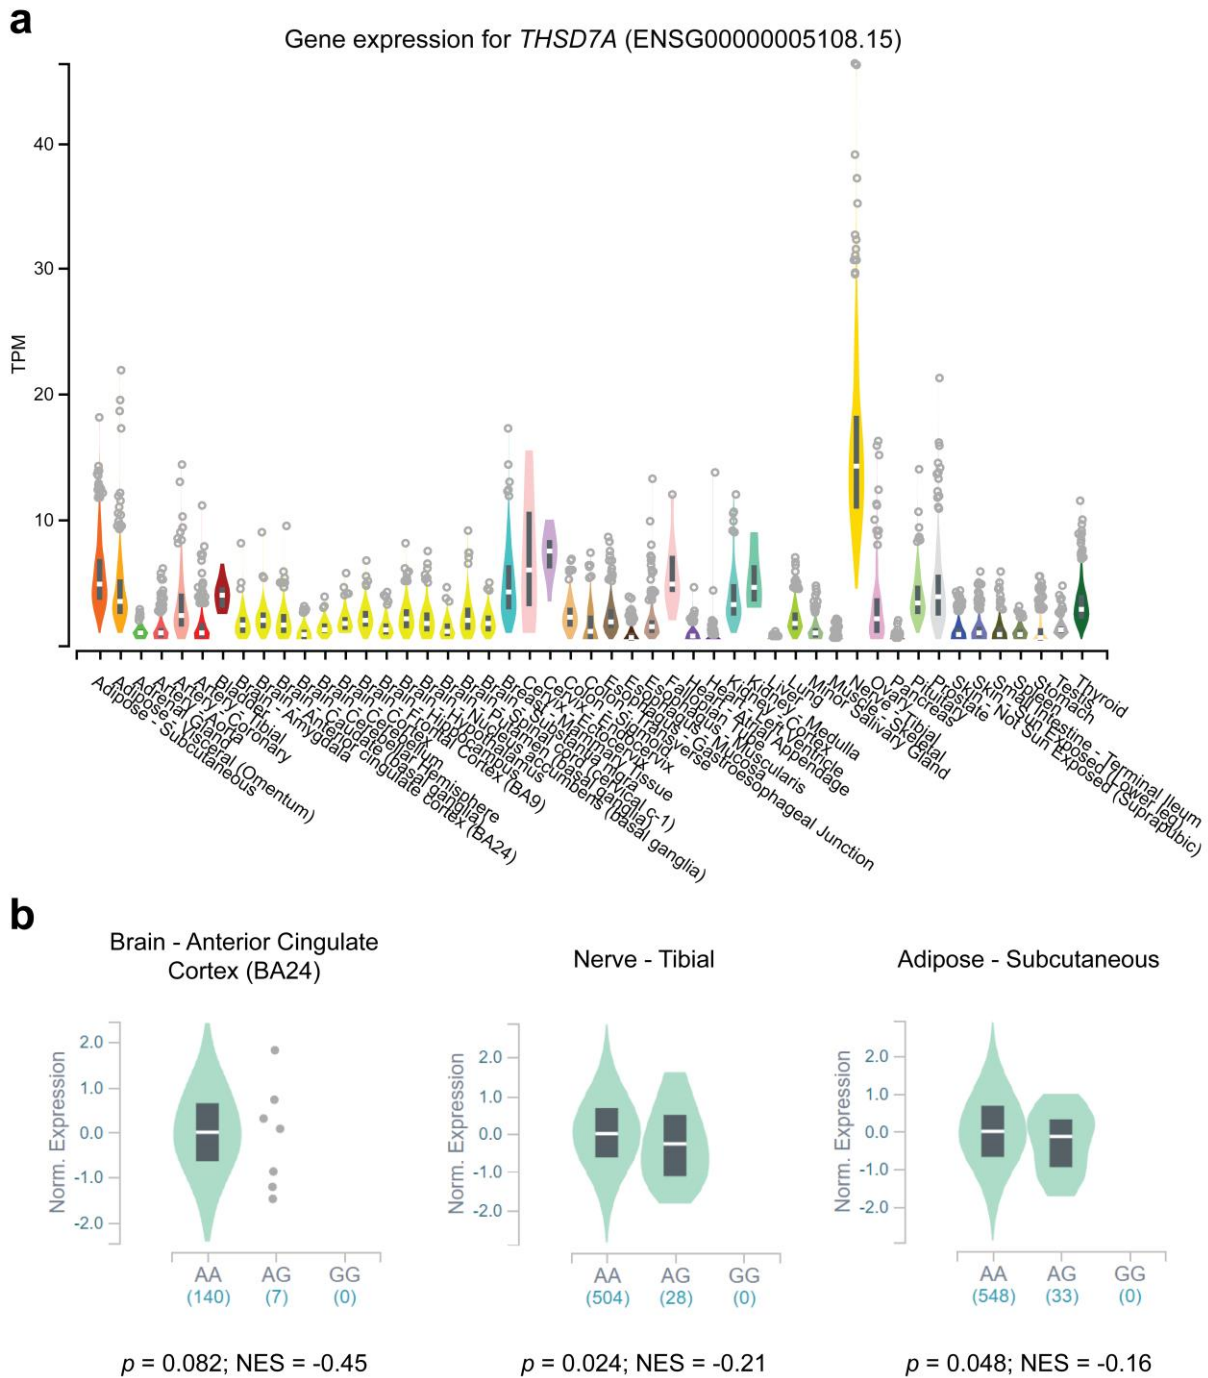



**Figure S5.** Splicing quantitative trait loci (sQTLs) for *ABCC1* and *DISP1/lnc-DISP1-1* in human gastrointestinal tract. The two nominally significant SNPs from the AED-MS response GWAS that mapped to *ABCC1* (rs875740,  $p = 2.0E-06$ ) and *DISP1/lnc-DISP1-1* (rs3470716,  $p = 2.0E-06$ ) were strong sQTLs for *ABCC1* and *DISP1/lnc-DISP1-1* in various segments of the gastrointestinal tract. No significant sQTLs were found in the human brain. Y-axis represents the intron-excision ratios and the intron where excision events occur in a SNP-dependent manner are stated in red. Graphics were obtained from GTEx Portal.

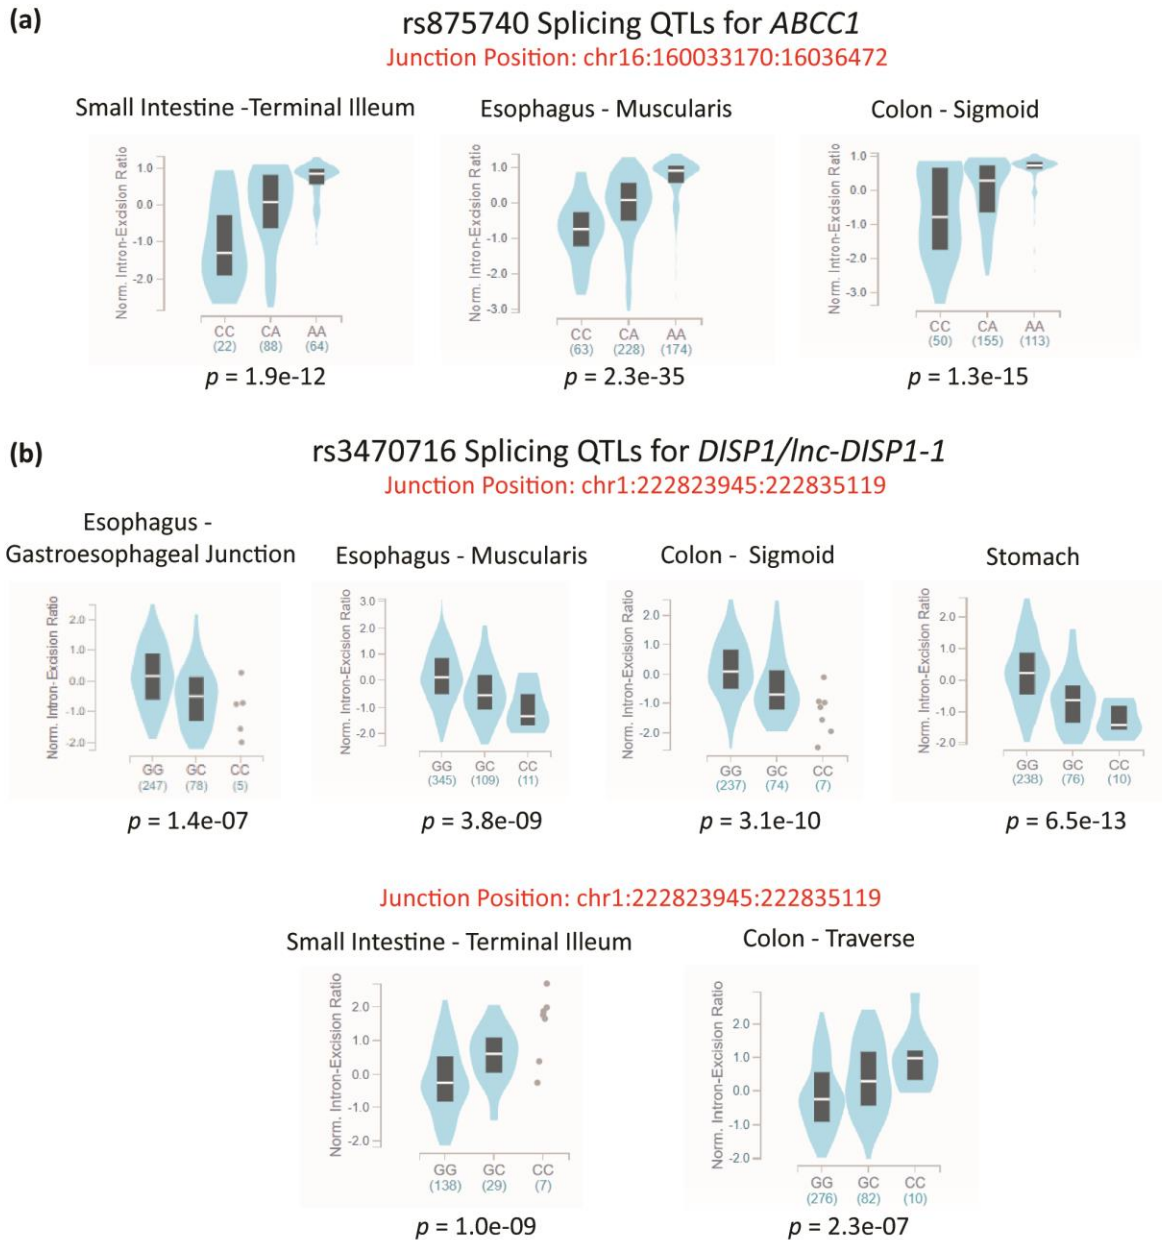

**Table S1.** Methylation quantitative trait loci (mQTL) information of *ABCC1* rs875740 and *DISP1* rs3470716.

| Top GWAS SNPs |              | mQTL Information |           |                 |        |                  |                                               |                         |              |                         |       |          |         | Reference Information |                |      |                                       |            |             |
|---------------|--------------|------------------|-----------|-----------------|--------|------------------|-----------------------------------------------|-------------------------|--------------|-------------------------|-------|----------|---------|-----------------------|----------------|------|---------------------------------------|------------|-------------|
| SNP           | Gene         | CHR              | Pos       | Gene            | Region | Effective Allele | ProbeID on Infinium HumanMethylation450 Array | Tissue                  | Tissue State | Effect Size ( $\beta$ ) | SE    | p-value  | FDR     | PMID                  | Journal        | Year | Platform                              | Population | Sample Size |
| rs34701716    | <i>DISP1</i> | 1                | 223959609 | <i>GTF2IP20</i> | intron | NA               | cg02923485                                    | Blood-Monocytes CD14+   | normal       | 0.430                   | 0.152 | 4.55E-03 | 0.0175  | 27863251              | Cell           | 2016 | Infinium HumanMethylation450 BeadChip | MIX        | 197         |
| rs34701716    | <i>DISP1</i> | 1                | 222910746 | <i>DISP1</i>    | intron | NA               | cg22827524                                    | Blood-Monocytes CD14+   | normal       | 0.413                   | 0.151 | 6.13E-03 | 0.0826  | 27863251              | Cell           | 2016 | Infinium HumanMethylation450 BeadChip | MIX        | 197         |
| rs875740      | <i>ABCC1</i> | 16               | 16190393  | <i>ABCC6</i>    | intron | NA               | cg01332683                                    | Blood-Monocytes CD14+   | normal       | 0.334                   | 0.104 | 1.34E-03 | 0.0128  | 27863251              | Cell           | 2016 | Infinium HumanMethylation450 BeadChip | MIX        | 197         |
| rs875740      | <i>ABCC1</i> | 16               | 16122741  | <i>ABCC1</i>    | intron | NA               | cg09473249                                    | Blood                   | normal       | -0.218                  | 0.038 | 1.45E-08 | 0.00831 | 27036880              | Genome Biology | 2016 | Infinium HumanMethylation450 BeadChip | EUR        | 834         |
| rs875740      | <i>ABCC1</i> | 16               | 16082095  | <i>ABCC1</i>    | intron | NA               | cg10111352                                    | Blood-Neutrophils CD16+ | normal       | -0.431                  | 0.124 | 5.02E-04 | 0.0241  | 27863251              | Cell           | 2016 | Infinium HumanMethylation450 BeadChip | MIX        | 197         |
